# Supplementary material for: Reversible structural transformation of supramolecular inorganic–organic hybrid glasses and zeolitic-imidazolate frameworks
Source: Royal Society of Chemistry journal article supplement (doi:10.1039/d3qm00879g), 2023-01-01
Supplement: d3qm00879g1.pdf [file d3qm00879g1.pdf]

## Supporting Information for

### **Reversible structural transformation of supramolecular inorganic-organic hybrid glass and zeolitic-imidazolate framework**

Mohamed. A. Ali<sup>1†\*</sup>, Moushira. A. Mohamed<sup>1†</sup>, Xiaofeng Liu<sup>2</sup>, Jianrong Qiu<sup>1\*</sup>

<sup>1</sup>State Key Laboratory of Modern Optical Instrumentation, College of Optical Science and Engineering,  
Zhejiang University, Hangzhou 310027, China

<sup>2</sup>School of Materials Science and Engineering, Zhejiang University, Hangzhou 310027, China

[†] These authors contributed equally to this work

\*Corresponding author. E-mail: qjr@zju.edu.cn (J.Q.); mohamedali@zju.edu.cn (M.A.A).

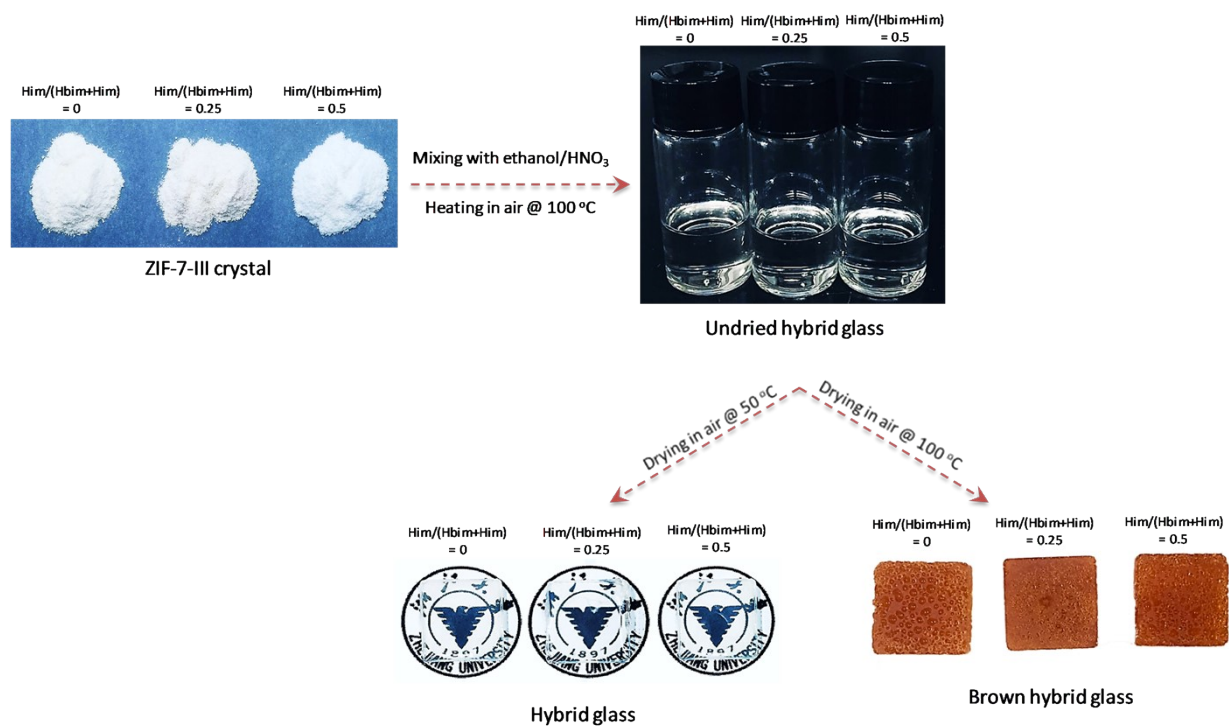

**Fig. S1.** Schematic illustration for the synthesis of the undried hybrid glasses, the hybrid glasses, and the brown hybrid glasses at  $\text{Him}/(\text{Hbim}+\text{Him}) = 0, 0.25$ , and  $0.5$ .

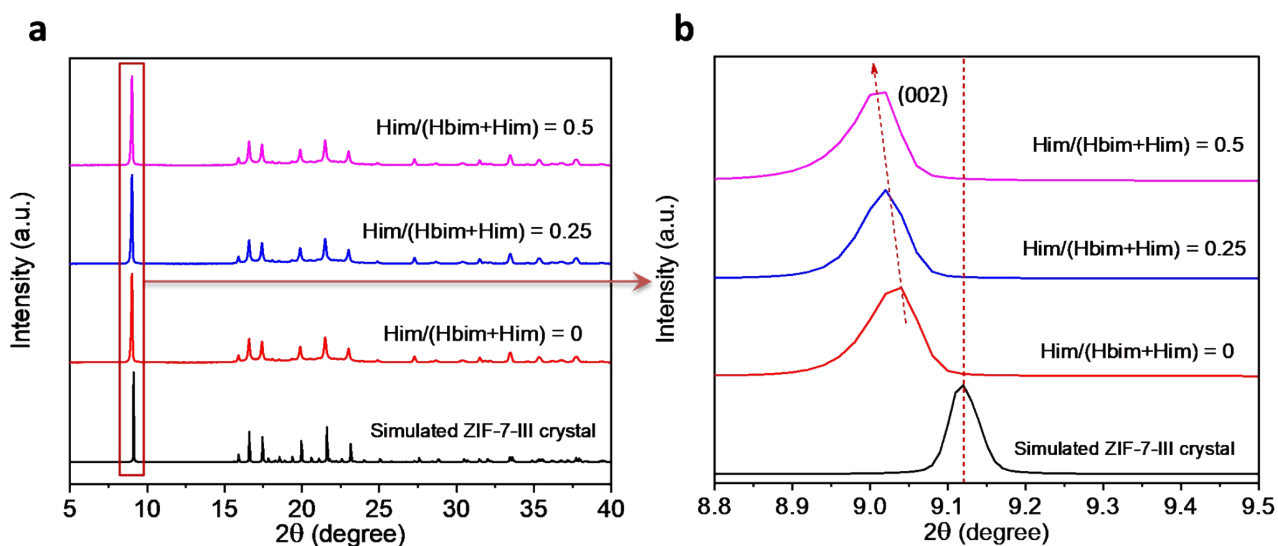

**Fig. S2.** **a**, PXRD patterns of the ZIF-7-III crystal at Him/(Hbim+Him) = 0, 0.25, and 0.5 synthesized by dissolution recrystallization method. **b**, The magnified pattern of (a) in the range of 8.8-9.5 degree. The observed peak shift in **b** is due to the increase of intermolecular spacing of ZIF-7-III crystal as a result of the substitution of Hbim by Him; where the molecular size of Him is smaller than that of Hbim.

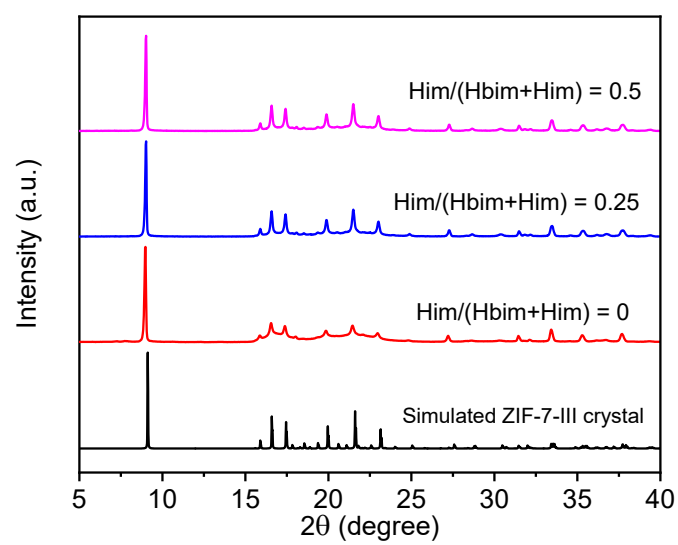

**Fig. S3.** PXRD patterns of the ZIF-7-III crystal at  $\text{Him}/(\text{Hbim}+\text{Him}) = 0, 0.25$ , and  $0.5$  synthesized by the solvothermal method.

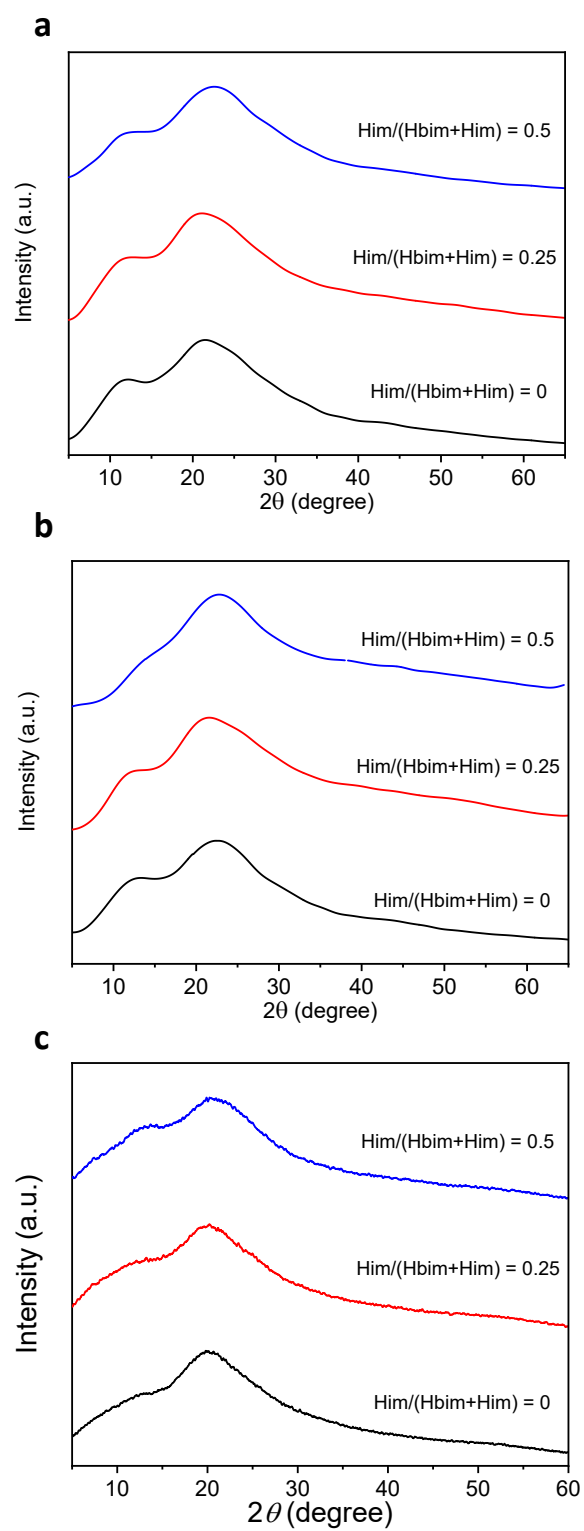

**Fig. S4.** PXRd patterns of the **a**, undried hybrid glasses, **b**, hybrid glasses, and **c**, brown hybrid glasses at Him/(Hbim+Him) = 0, 0.25, and 0.5.

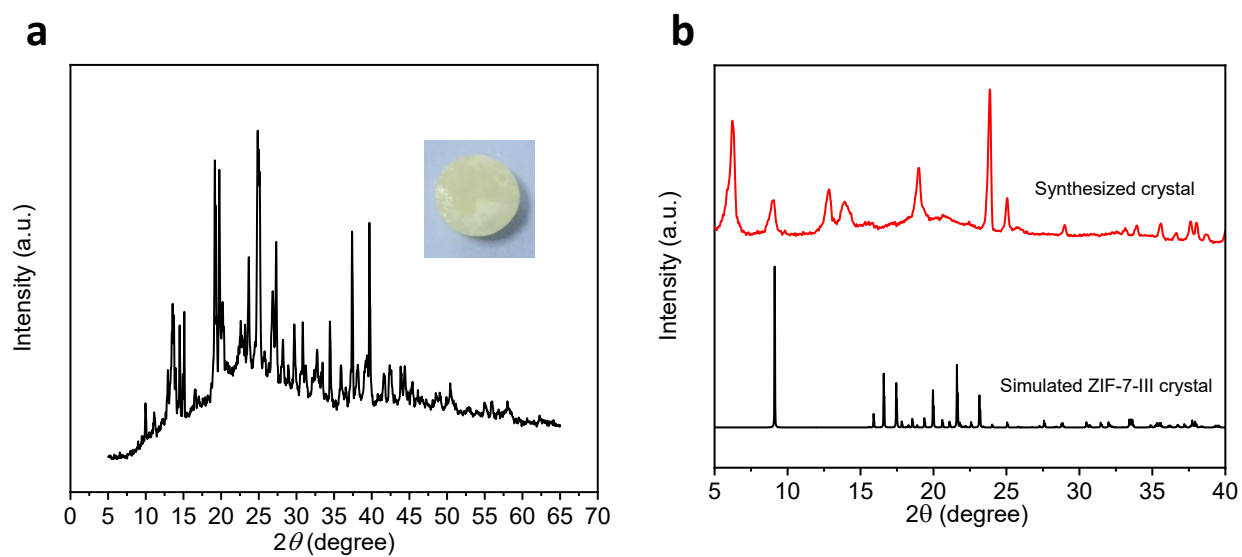

**Fig. S5.** PXRD patterns of the as-synthesized samples at  $\text{Him}/(\text{Hbim}+\text{Him}) = 0.75$  using **a**, network-solvation method and **b**, solvothermal method. The inset of **a** is a photograph of the corresponding sample.

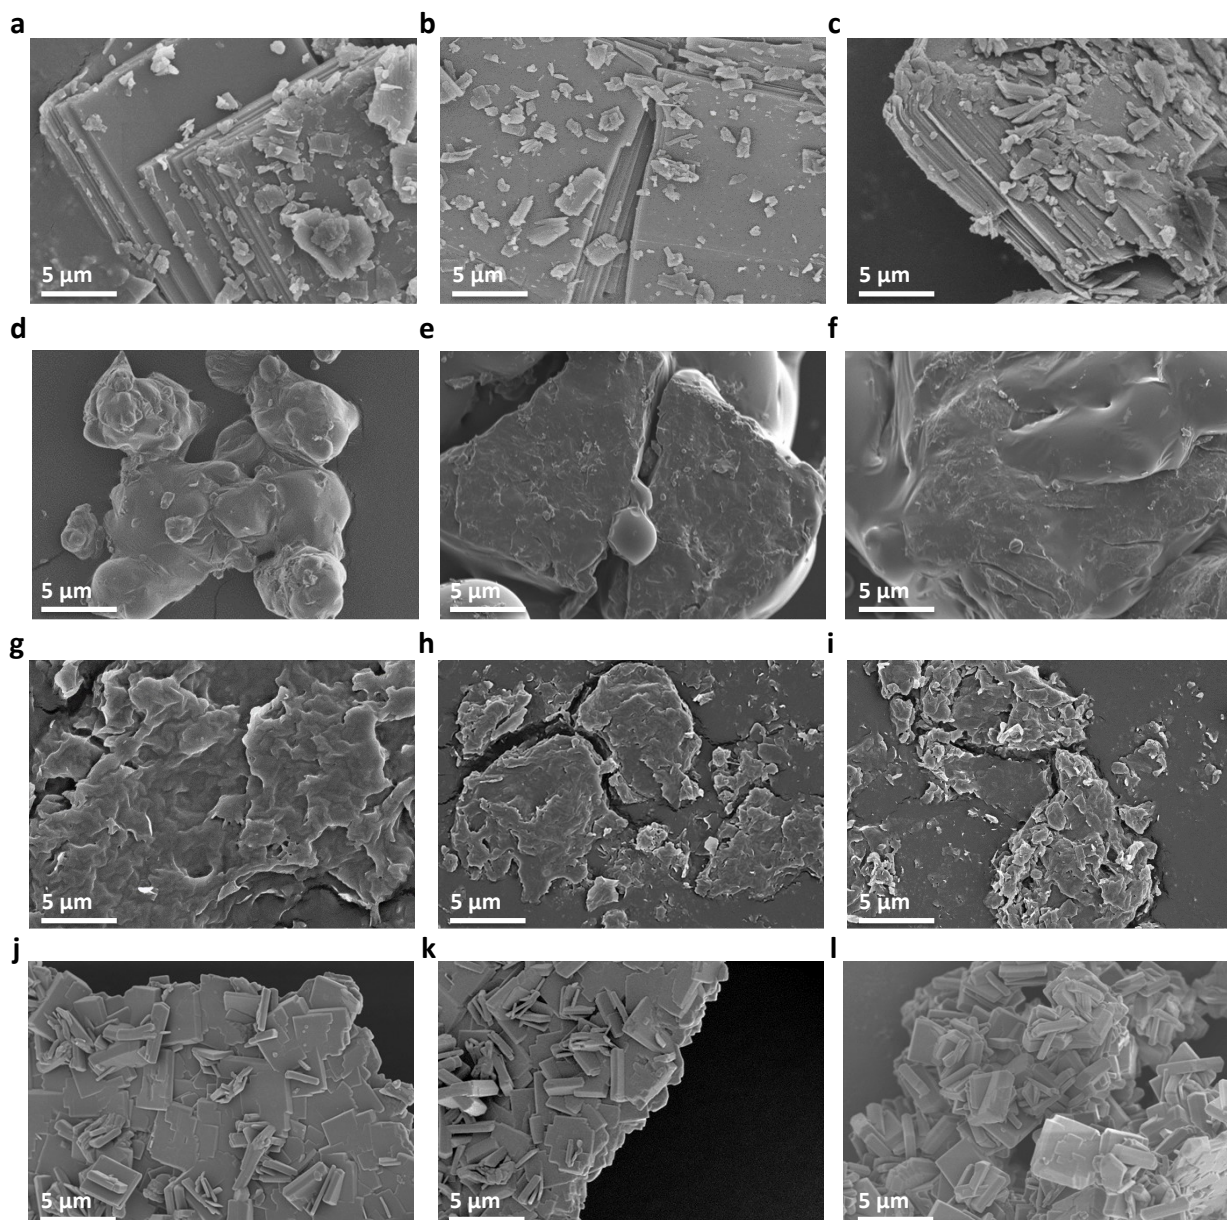

**Fig. S6.** SEM images of the **a-c**, ZIF-7-III crystals (solvothermal), **d-f**, hybrid glasses (solvation), **g-i**, brown hybrid glasses, and **j-l**, ZIF-7-III crystals (dissolution) at **a, d, g, j**,  $\text{Him}/(\text{Hbim}+\text{Him}) = 0$ , **b, e, h, k**,  $\text{Him}/(\text{Hbim}+\text{Him}) = 0.25$ , and **c, f, i, l**,  $\text{Him}/(\text{Hbim}+\text{Him}) = 0.5$ .

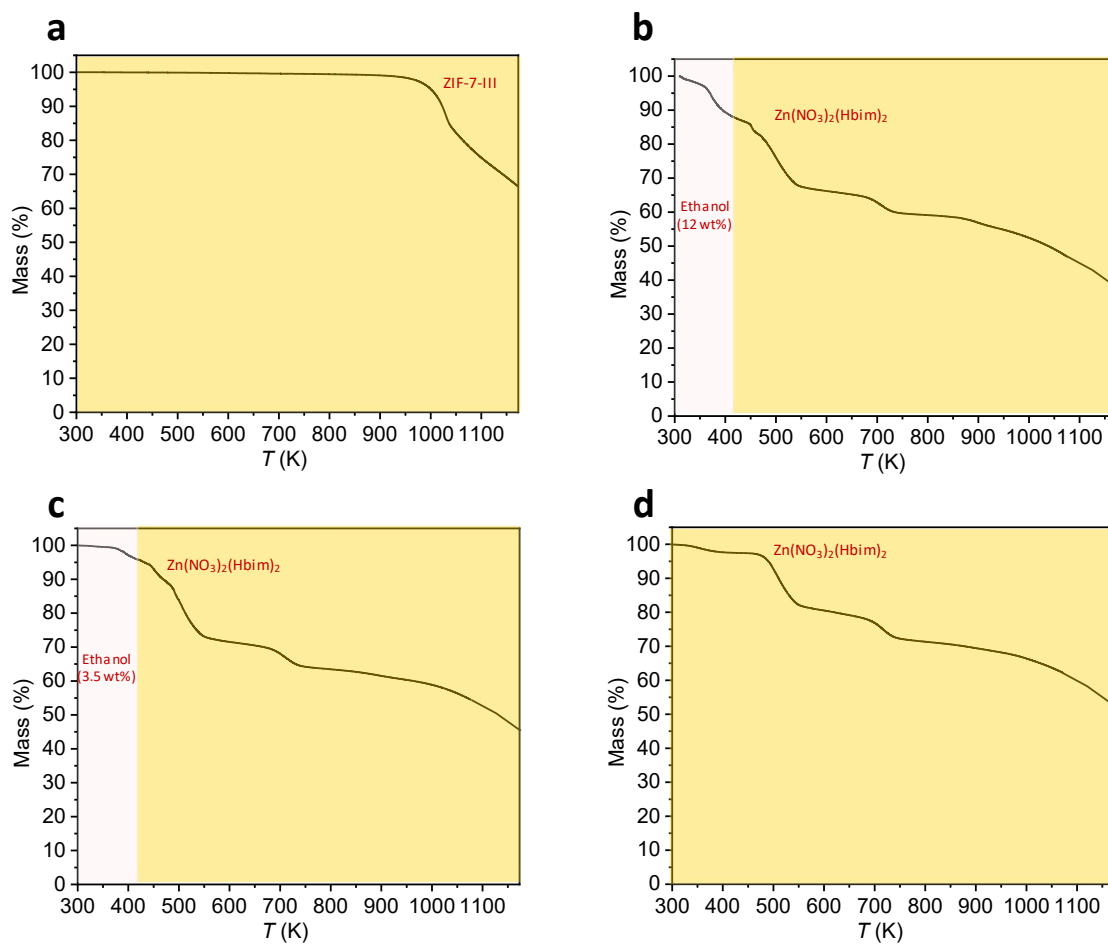

**Fig. S7.** TGA traces of the **a**, ZIF-7-III crystal, **b**, undried hybrid glass, **c**, hybrid glass, and **d**, brown hybrid glass at  $\text{Him}/(\text{Hbim}+\text{Him}) = 0$ .

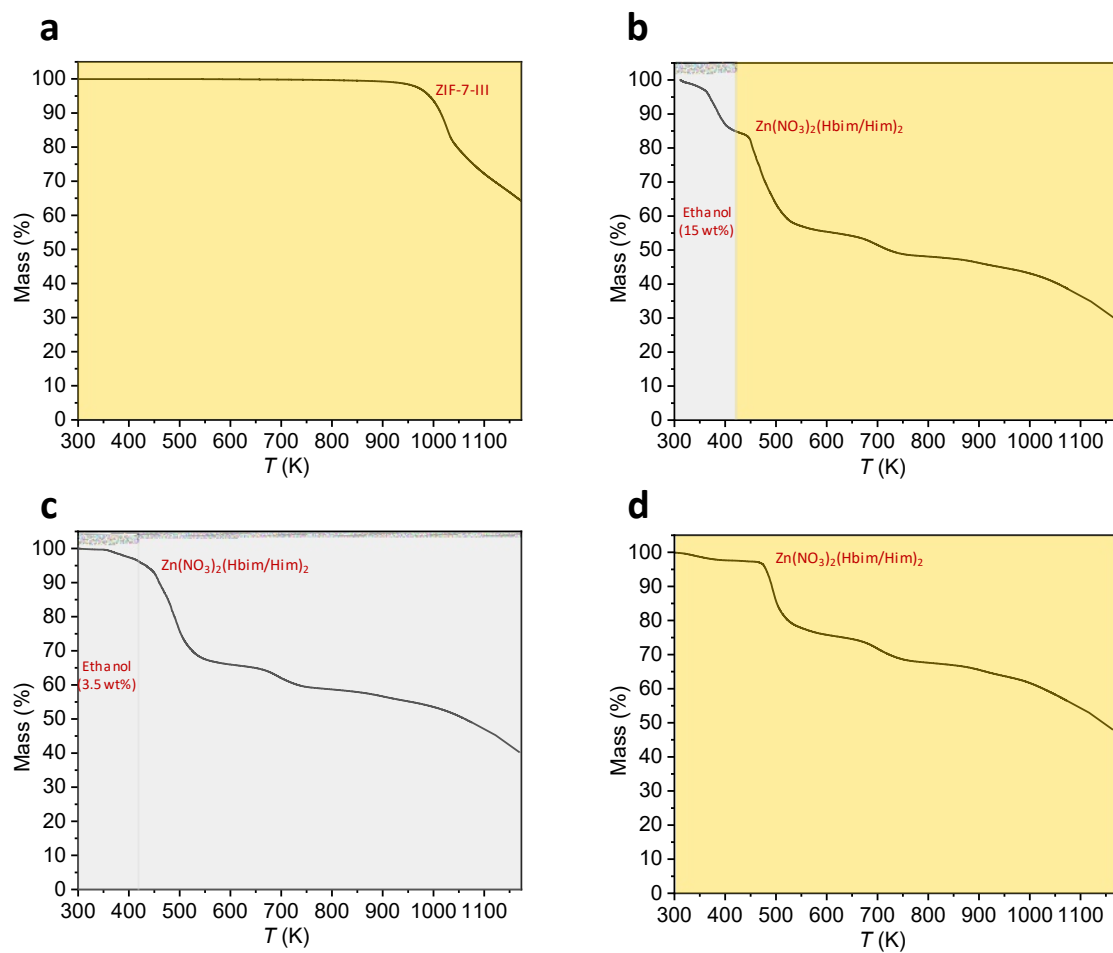

**Fig. S8.** TGA traces of the **a**, ZIF-7-III crystal, **b**, undried hybrid glass, **c**, hybrid glass, and **d**, brown hybrid glass at  $\text{Him}/(\text{Hbim}+\text{Him}) = 0.25$ .

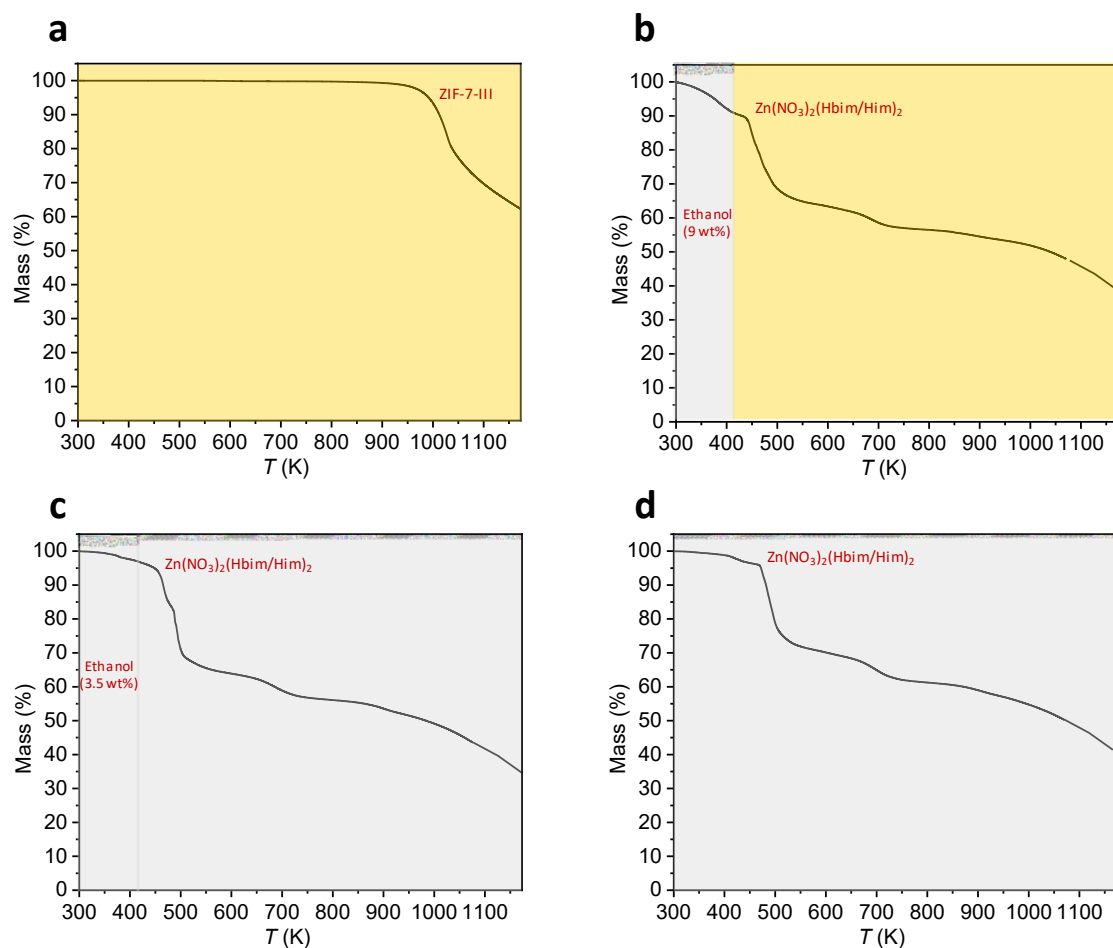

**Fig. S9.** TGA traces of the **a**, ZIF-7-III crystal, **b**, undried hybrid glass, **c**, hybrid glass, and **d**, brown hybrid glass at  $\text{Him}/(\text{Hbim}+\text{Him}) = 0.5$ .

**Table S1.** Measured glass compositions based on the TGA traces of the undried hybrid glasses, hybrid glasses, and brown hybrid glasses at different ratios of organic linkers.

| Added Him/(Hbim+Him) | Sample               | measured by TGA (wt%)                                                       |
|----------------------|----------------------|-----------------------------------------------------------------------------|
| 0                    | Undried hybrid glass | 88 Zn(NO <sub>3</sub> ) <sub>2</sub> (Hbim) <sub>2</sub> -12 Ethanol        |
|                      | Hybrid glass         | 96.5 Zn(NO <sub>3</sub> ) <sub>2</sub> (Hbim) <sub>2</sub> -3.5 Ethanol     |
|                      | Brown hybrid glass   | 100 Zn(NO <sub>3</sub> ) <sub>2</sub> (Hbim) <sub>2</sub>                   |
| 0.25                 | Undried hybrid glass | 85 Zn(NO <sub>3</sub> ) <sub>2</sub> (Hbim/Him) <sub>2</sub> -15 Ethanol    |
|                      | Hybrid glass         | 96.5 Zn(NO <sub>3</sub> ) <sub>2</sub> (Hbim/Him) <sub>2</sub> -3.5 Ethanol |
|                      | Brown hybrid glass   | 100 Zn(NO <sub>3</sub> ) <sub>2</sub> (Hbim/Him) <sub>2</sub>               |
| 0.5                  | Undried hybrid glass | 91 Zn(NO <sub>3</sub> ) <sub>2</sub> (Hbim/Him) <sub>2</sub> -9 Ethanol     |
|                      | Hybrid glass         | 96.5 Zn(NO <sub>3</sub> ) <sub>2</sub> (Hbim/Him) <sub>2</sub> -3.5 Ethanol |
|                      | Brown hybrid glass   | 100 Zn(NO <sub>3</sub> ) <sub>2</sub> (Hbim/Him) <sub>2</sub>               |

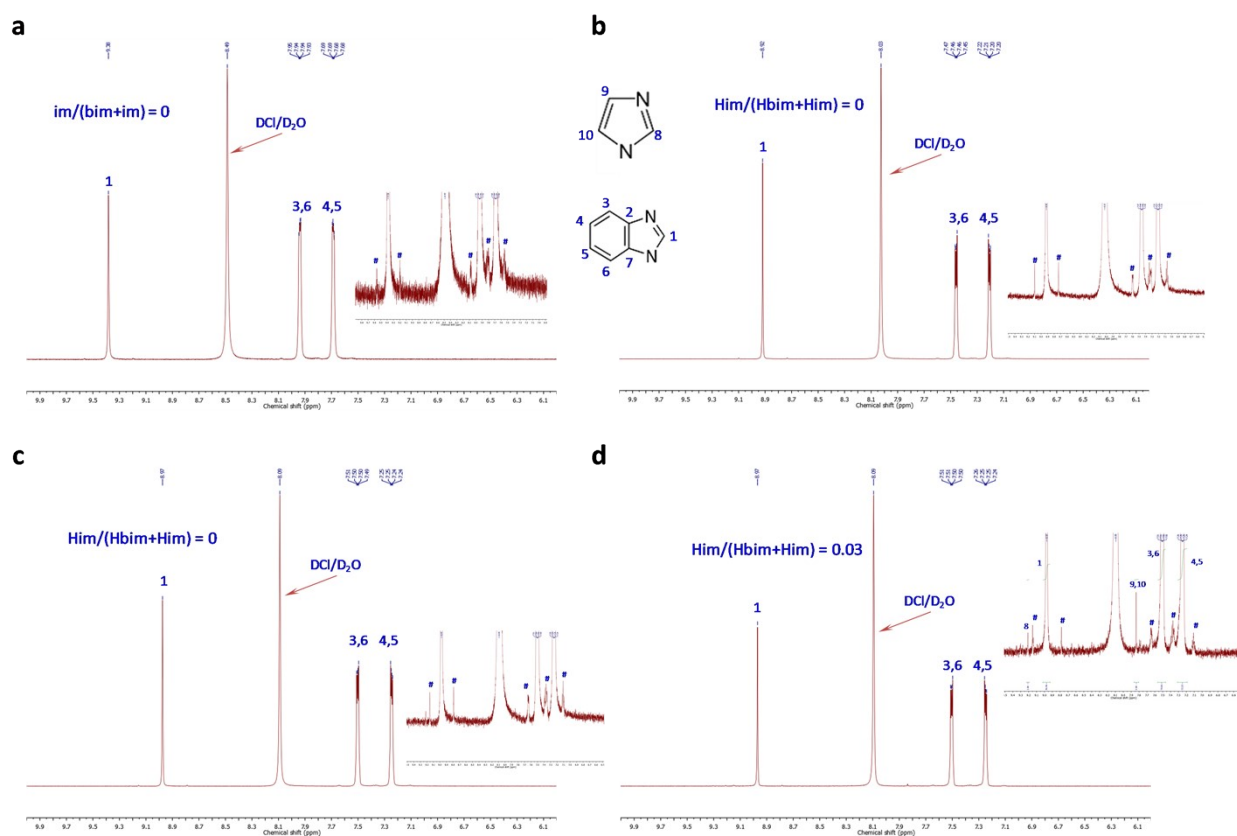

**Fig. S10.** Solution  $^1\text{H}$ -NMR spectra of the **a**, ZIF-7-III crystal, **b**, undried hybrid glass, **c**, hybrid glass, and **d**, brown hybrid glass at  $Him/(Hbim+Him) = 0$ . The insets are the magnified  $^1\text{H}$ -NMR spectra. The normalized proton integration values and the proton peak positions are in green and blue colors, respectively. The marked peaks with # are unknown. The insets are the molecular structures of Him and Hbim.

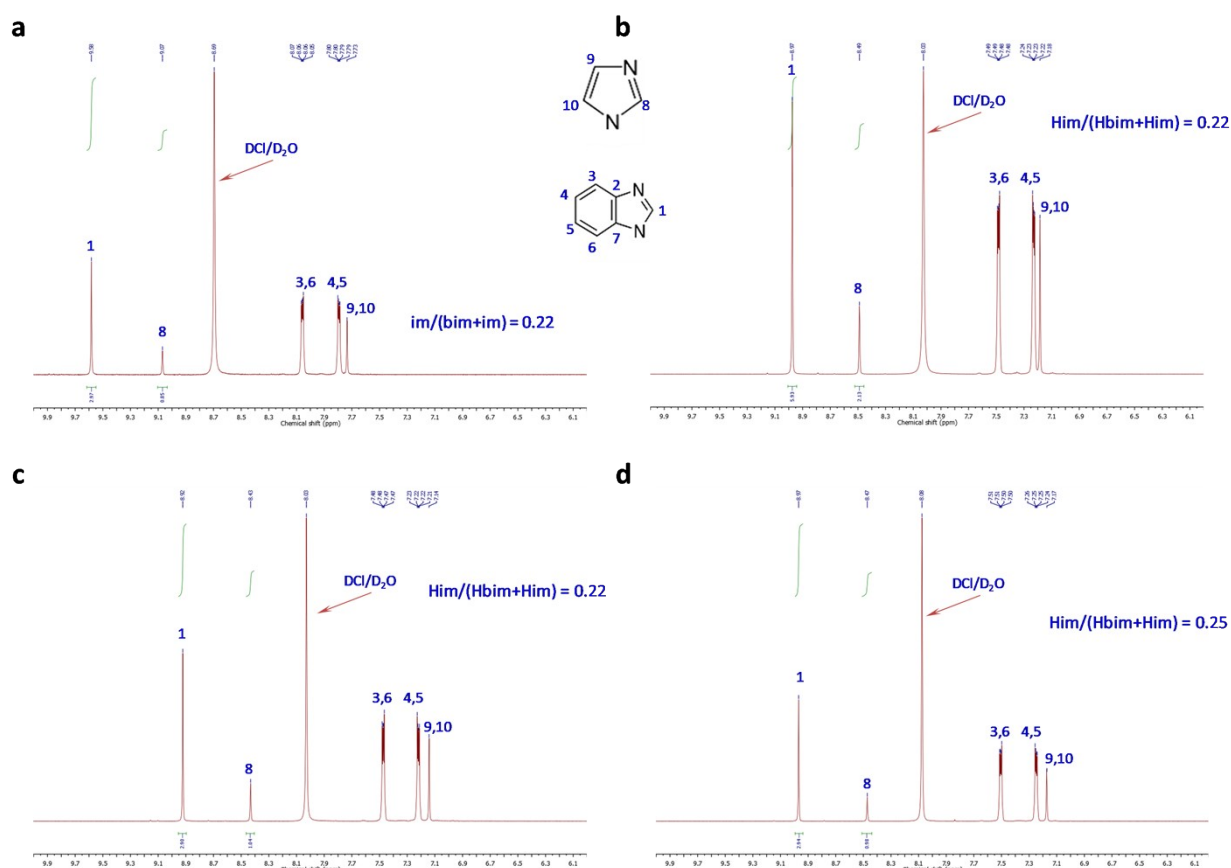

**Fig. S11.** Solution  $^1\text{H}$ -NMR spectra of the **a**, ZIF-7-III crystal, **b**, undried hybrid glass, **c**, hybrid glass, and **d**, brown hybrid glass at  $\text{Him}/(\text{Hbim}+\text{Him}) = 0.25$ . The normalized proton integration values and the proton peak positions are in green and blue colors, respectively. The insets are the molecular structures of Him and Hbim.

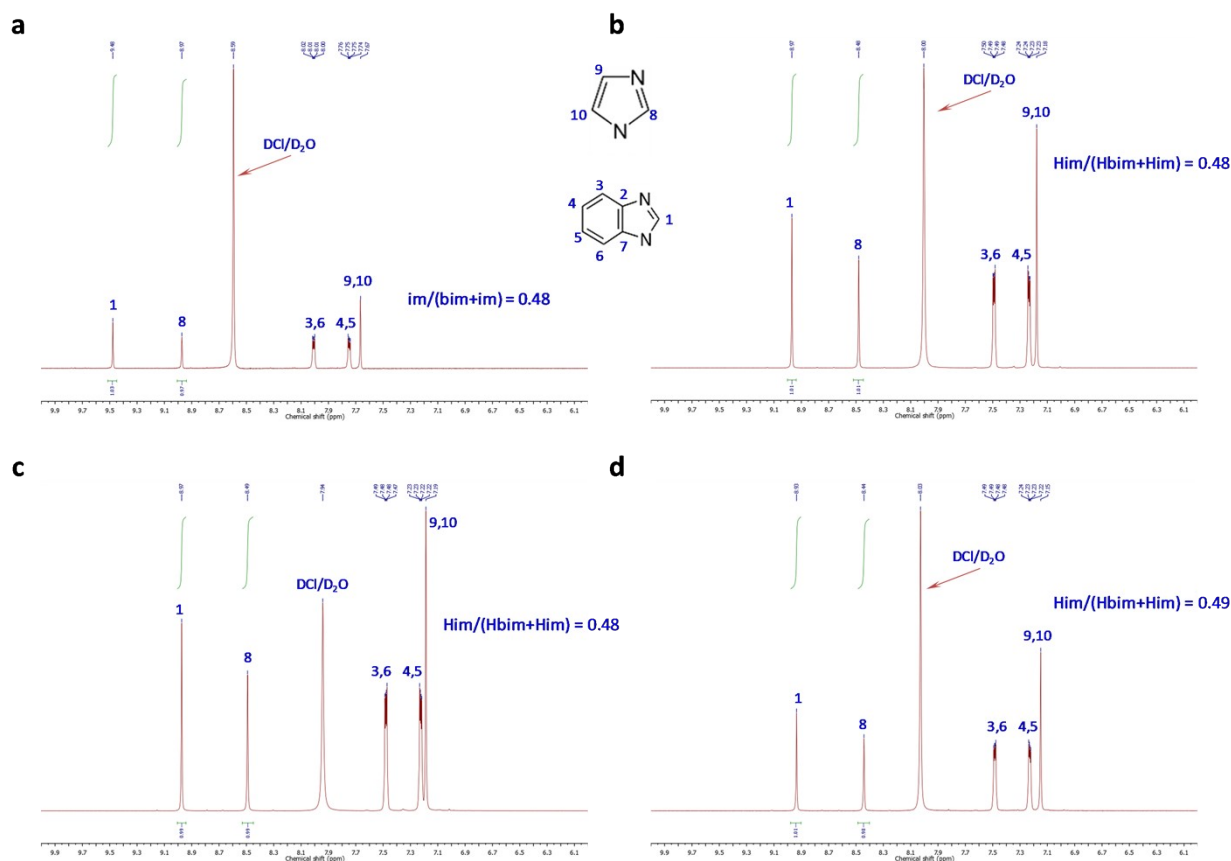

**Fig. S12.** Solution  $^1\text{H}$ -NMR spectra of the **a**, ZIF-7-III crystal, **b**, undried hybrid glass, **c**, hybrid glass, and **d**, brown hybrid glass at  $Him/(Hbim+Him) = 0.5$ . The normalized proton integration values and the proton peak positions are in green and blue colors, respectively. The insets are the molecular structures of Him and Hbim.

**Table S2.** Measured Him/(Hbim+Him) ratio and the detailed compositions for the prepared ZIF-7-III crystals, undried hybrid glasses, hybrid glasses, and brown hybrid glasses, based on the TGA, ICP-MS, CHNO, and NMR measurements.

| Sample               | Added Him/(Hbim+Him) | Measured Him/(Hbim+Him) | Composition (wt%)                                                                   |
|----------------------|----------------------|-------------------------|-------------------------------------------------------------------------------------|
| ZIF-7-III crystal    | 0                    | 0                       | $\text{Zn}_2(\text{bim})_4$                                                         |
| Undried hybrid glass | -                    | 0                       | 88 $\text{Zn}(\text{NO}_3)_2(\text{Hbim})_2$ -12 Ethanol                            |
| Hybrid glass         | -                    | 0                       | 96.5 $\text{Zn}(\text{NO}_3)_2(\text{Hbim})_2$ -3.5 Ethanol                         |
| Brown hybrid glass   | -                    | 0.03                    | 100 $\text{Zn}(\text{NO}_3)_2(\text{Hbim})_{1.94}(\text{Him})_{0.06}$               |
| ZIF-7-III crystal    | 0.25                 | 0.22                    | $\text{Zn}_2(\text{bim})_{3.22}(\text{im})_{0.88}$                                  |
| Undried hybrid glass | -                    | 0.22                    | 85 $\text{Zn}(\text{NO}_3)_2(\text{Hbim})_{1.61}(\text{Him})_{0.44}$ -15 Ethanol    |
| Hybrid glass         | -                    | 0.22                    | 96.5 $\text{Zn}(\text{NO}_3)_2(\text{Hbim})_{1.61}(\text{Him})_{0.44}$ -3.5 Ethanol |
| Brown hybrid glass   | -                    | 0.25                    | 100 $\text{Zn}(\text{NO}_3)_2(\text{Hbim})_{1.5}(\text{Him})_{0.5}$                 |
| ZIF-7-III crystal    | 0.5                  | 0.48                    | $\text{Zn}_2(\text{bim})_{2.08}(\text{im})_{1.92}$                                  |
| Undried hybrid glass | -                    | 0.48                    | 91 $\text{Zn}(\text{NO}_3)_2(\text{Hbim})_{1.04}(\text{Him})_{0.96}$ -9 Ethanol     |
| Hybrid glass         | -                    | 0.48                    | 96.5 $\text{Zn}(\text{NO}_3)_2(\text{Hbim})_{1.04}(\text{Him})_{0.96}$ -3.5 Ethanol |
| Brown hybrid glass   | -                    | 0.49                    | 100 $\text{Zn}(\text{NO}_3)_2(\text{Hbim})_{1.02}(\text{Him})_{0.98}$               |

**Table S3.** Results of elemental analysis for the as-synthesized ZIF-7-III crystals, undried hybrid glasses, hybrid glasses, and brown hybrid glasses at different ratios of organic linkers.

| Measured<br>Him/(Hbim+Him) | Sample               | measured (CHNO+ICP-MS) (wt%) |       |      |       |       | Calculated (wt%) |       |      |       |       | Composition (wt%)                                                                                |
|----------------------------|----------------------|------------------------------|-------|------|-------|-------|------------------|-------|------|-------|-------|--------------------------------------------------------------------------------------------------|
|                            |                      | Zn                           | C     | H    | N     | O     | Zn               | C     | H    | N     | O     |                                                                                                  |
| 0                          | ZIF-7-III crystal    | 22.65                        | 55.35 | 3.33 | 18.89 | <0.01 | 21.84            | 56.11 | 3.34 | 18.71 | -     | Zn <sub>2</sub> (bim) <sub>4</sub>                                                               |
| 0                          | Undried hybrid glass | 14.05                        | 40.44 | 3.99 | 17.19 | 24.39 | 13.52            | 41.02 | 4.05 | 17.38 | 24.03 | 88 Zn(NO <sub>3</sub> ) <sub>2</sub> (Hbim) <sub>2</sub> -12 Ethanol                             |
| 0                          | Hybrid glass         | 15.49                        | 39.16 | 3.12 | 18.93 | 23.31 | 14.83            | 39.94 | 3.18 | 19.06 | 22.99 | 96.5 Zn(NO <sub>3</sub> ) <sub>2</sub> (Hbim) <sub>2</sub> -3.5 Ethanol                          |
| 0.03                       | Brown hybrid glass   | 15.89                        | 39.65 | 3.01 | 19.09 | 23.12 | 15.37            | 39.49 | 2.82 | 19.75 | 22.57 | 100 Zn(NO <sub>3</sub> ) <sub>2</sub> (Hbim) <sub>1.94</sub> (Him) <sub>0.06</sub>               |
| 0.22                       | ZIF-7-III crystal    | 24.12                        | 52.02 | 3.27 | 20.55 | <0.01 | 23.83            | 52.48 | 3.28 | 20.41 | -     | Zn <sub>2</sub> (bim) <sub>3.22</sub> (im) <sub>0.88</sub>                                       |
| 0.22                       | Undried hybrid glass | 14.05                        | 37.8  | 4.21 | 17.88 | 26.11 | 13.88            | 38.4  | 4.29 | 17.83 | 25.6  | 85 Zn(NO <sub>3</sub> ) <sub>2</sub> (Hbim) <sub>1.61</sub> (Him) <sub>0.44</sub> -15 Ethanol    |
| 0.22                       | Hybrid glass         | 16.02                        | 35.82 | 3.05 | 20.27 | 24.93 | 15.75            | 36.53 | 3.11 | 20.25 | 24.36 | 96.5 Zn(NO <sub>3</sub> ) <sub>2</sub> (Hbim) <sub>1.61</sub> (Him) <sub>0.44</sub> -3.5 Ethanol |
| 0.25                       | Brown hybrid glass   | 16.15                        | 35.51 | 2.95 | 20.51 | 24.88 | 16.33            | 35.97 | 2.75 | 20.98 | 23.98 | 100 Zn(NO <sub>3</sub> ) <sub>2</sub> (Hbim) <sub>1.5</sub> (Him) <sub>0.5</sub>                 |
| 0.48                       | ZIF-7-III crystal    | 26.95                        | 47.72 | 3.19 | 22.63 | <0.01 | 26.22            | 48.12 | 3.21 | 22.45 | -     | Zn <sub>2</sub> (bim) <sub>2.08</sub> (im) <sub>1.92</sub>                                       |
| 0.48                       | Undried hybrid glass | 16.22                        | 33.15 | 3.55 | 20.59 | 27.03 | 15.85            | 33.79 | 3.6  | 20.36 | 26.4  | 91 Zn(NO <sub>3</sub> ) <sub>2</sub> (Hbim) <sub>1.04</sub> (Him) <sub>0.96</sub> -9 Ethanol     |
| 0.48                       | Hybrid glass         | 17.16                        | 31.99 | 2.99 | 21.94 | 26.52 | 16.81            | 32.67 | 3.03 | 21.6  | 25.89 | 96.5 Zn(NO <sub>3</sub> ) <sub>2</sub> (Hbim) <sub>1.04</sub> (Him) <sub>0.96</sub> -3.5 Ethanol |
| 0.49                       | Brown hybrid glass   | 17.34                        | 31.85 | 2.85 | 22.12 | 26.42 | 17.41            | 31.97 | 2.66 | 22.37 | 25.57 | 100 Zn(NO <sub>3</sub> ) <sub>2</sub> (Hbim) <sub>1.02</sub> (Him) <sub>0.98</sub>               |

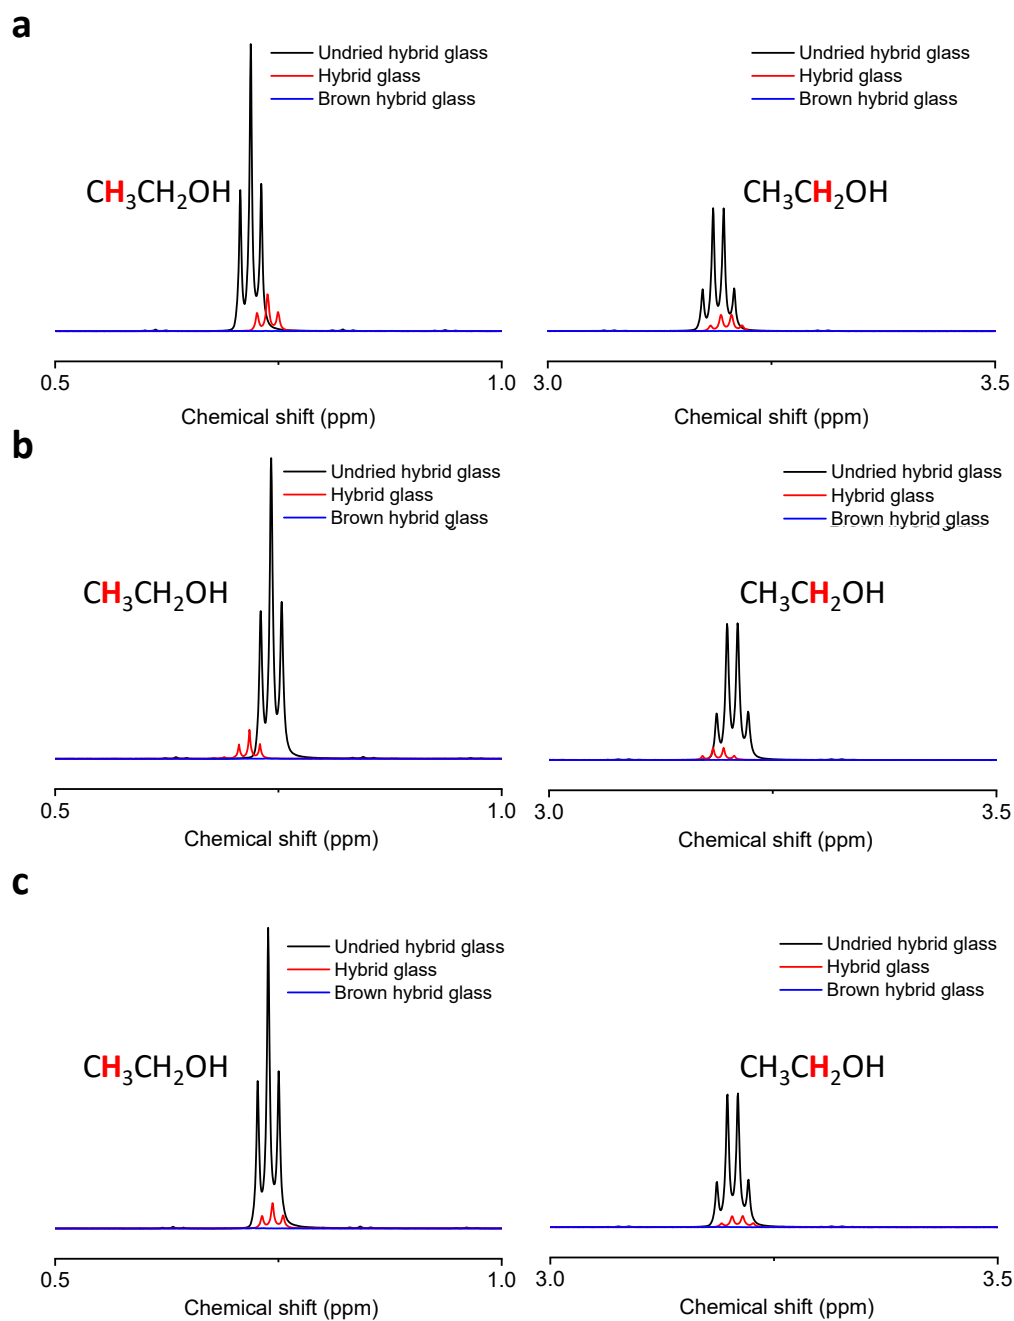

**Fig. S13.** Solution  $^1\text{H}$ -NMR spectra of the undried hybrid glasses, hybrid glasses, and brown hybrid glasses at **a**,  $\text{Him}/(\text{Hbim}+\text{Him}) = 0$ , **b**,  $\text{Him}/(\text{Hbim}+\text{Him}) = 0.25$ , and **c**,  $\text{Him}/(\text{Hbim}+\text{Him}) = 0.5$ .

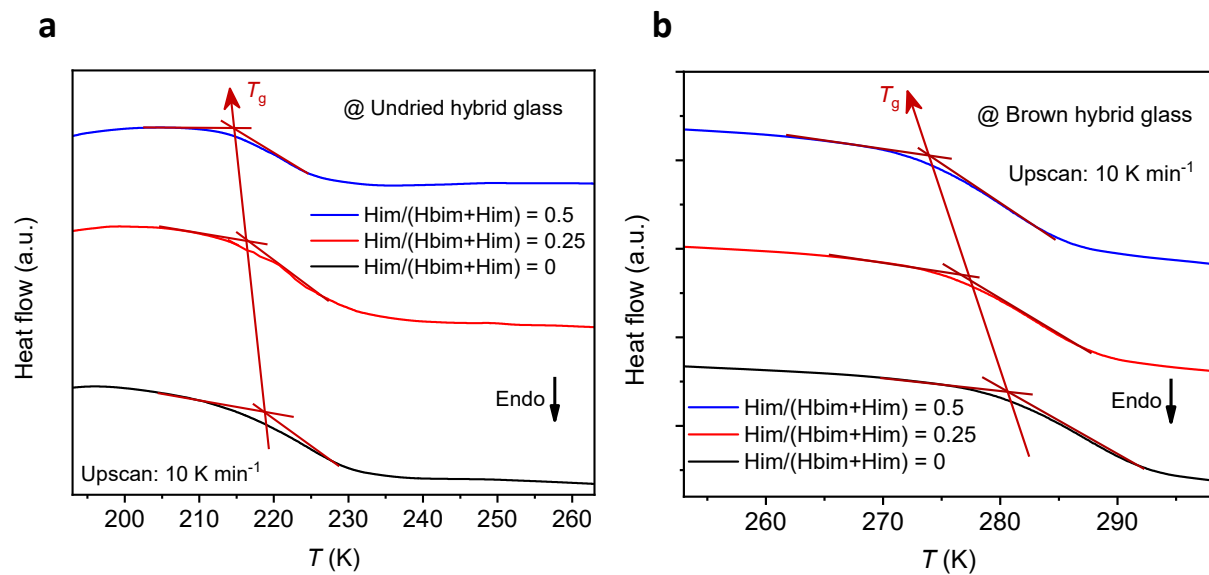

**Fig. S14.** DSC traces of the **a**, undried hybrid glasses and **b**, brown hybrid glasses at  $\text{Him}/(\text{Hbim}+\text{Him}) = 0, 0.25$ , and  $0.5$ .

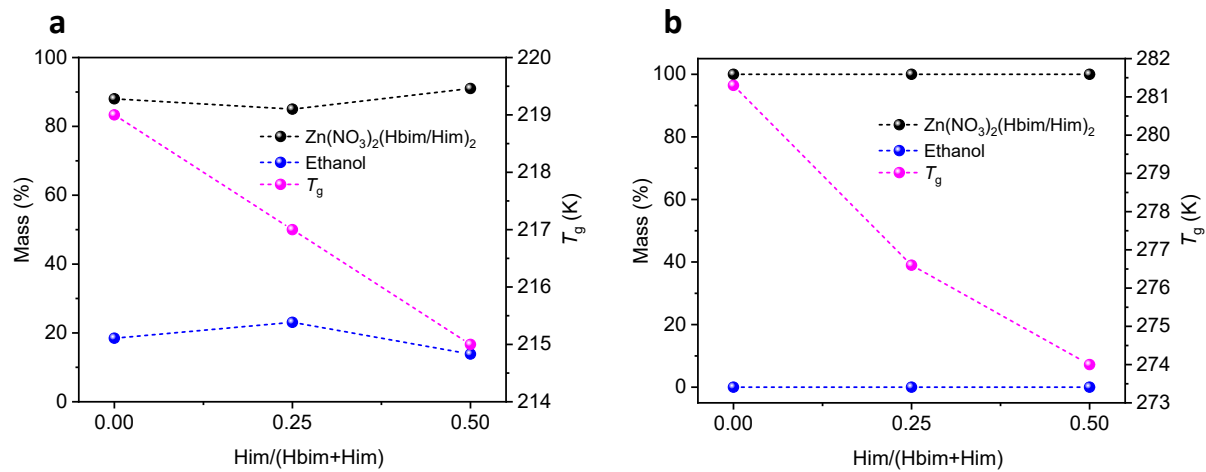

**Fig. S15.** The composition of the as-synthesized glasses and the  $T_g$  value as a function of the organic linkers ratio for **a**, undried hybrid glasses and **b**, brown hybrid glasses.

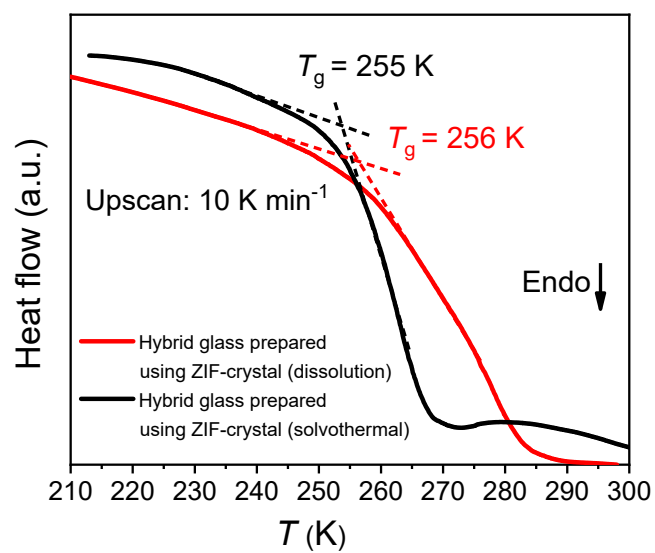

**Fig. S16.** DSC traces of the prepared hybrid glasses using ZIF-7-III crystals that prepared by solvothermal and dissolution-recrystallization methods at  $\text{Him}/(\text{Hbim}+\text{Him}) = 0$ .

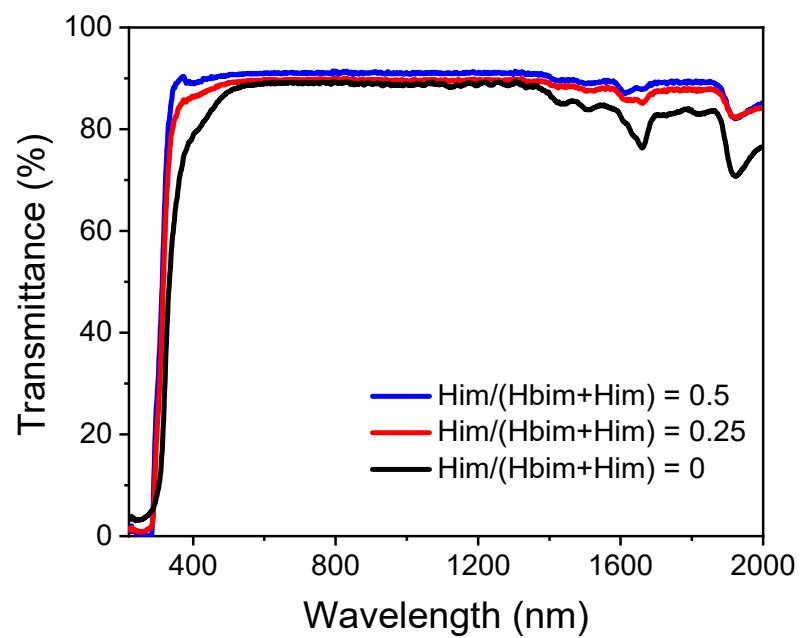

**Fig. S17.** UV-Vis-NIR transmission spectra of the hybrid glasses with a 1 mm in thickness at  $H_{im}/(H_{bim}+H_{im}) = 0$ , 0.25, and 0.5.

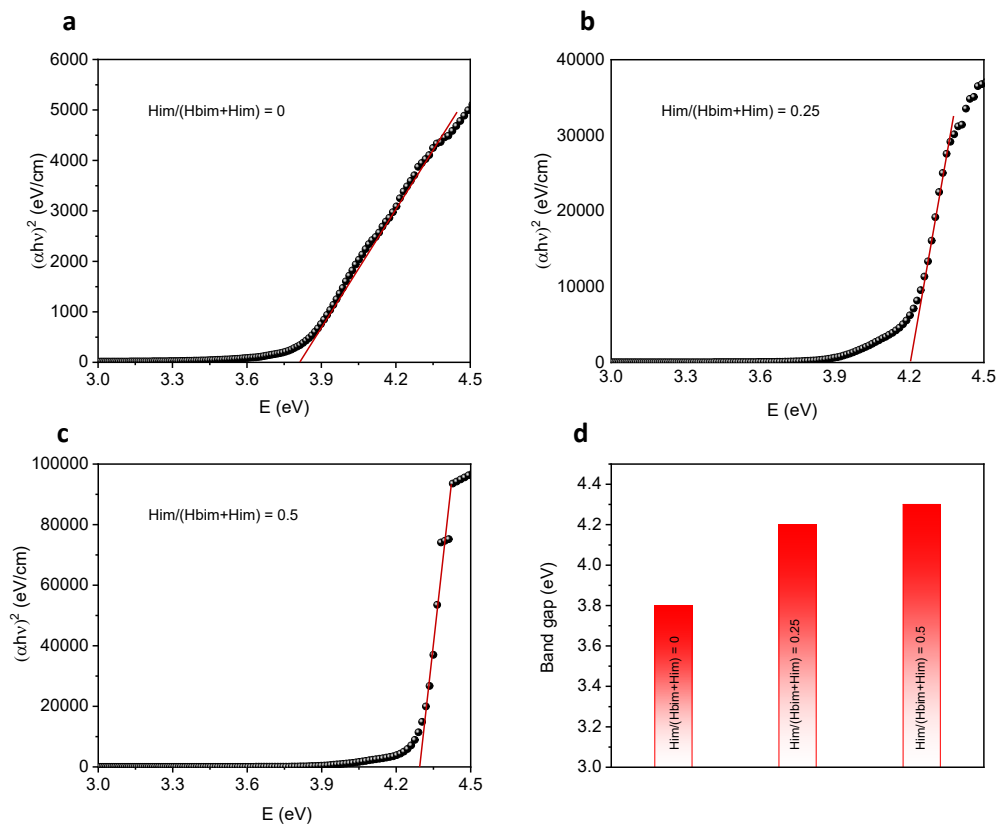

**Fig. S18.** Tauc's plot of the hybrid glasses at **a**,  $Him/(Hbim+Him) = 0$ , **b**,  $Him/(Hbim+Him) = 0.25$ , and **c**,  $Him/(Hbim+Him) = 0.5$ . **d**, Dependence of the band gap of glass on the organic linkers ratio.

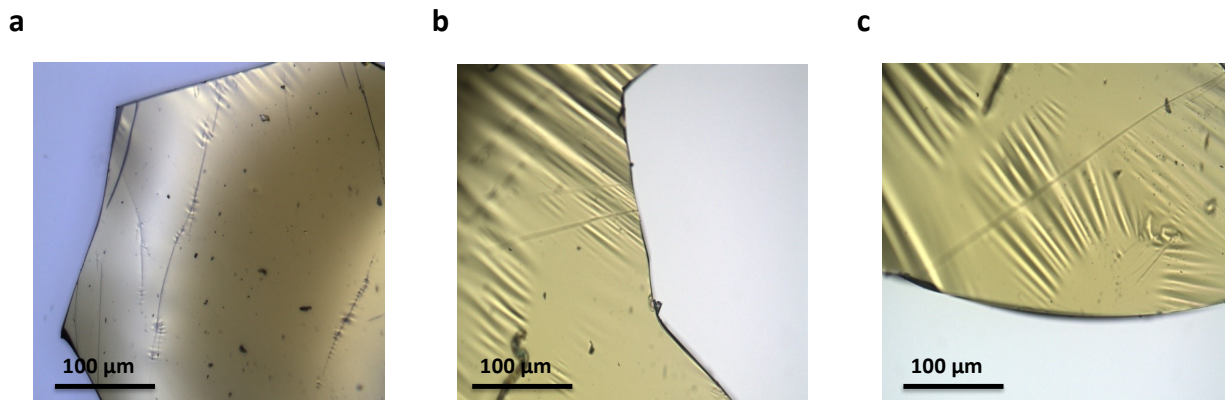

**Fig. S19.** Optical images of the brown hybrid glasses at **a**,  $\text{Him}/(\text{Hbim}+\text{Him}) = 0$ , **b**,  $\text{Him}/(\text{Hbim}+\text{Him}) = 0.25$ , and **c**,  $\text{Him}/(\text{Hbim}+\text{Him}) = 0.5$ .

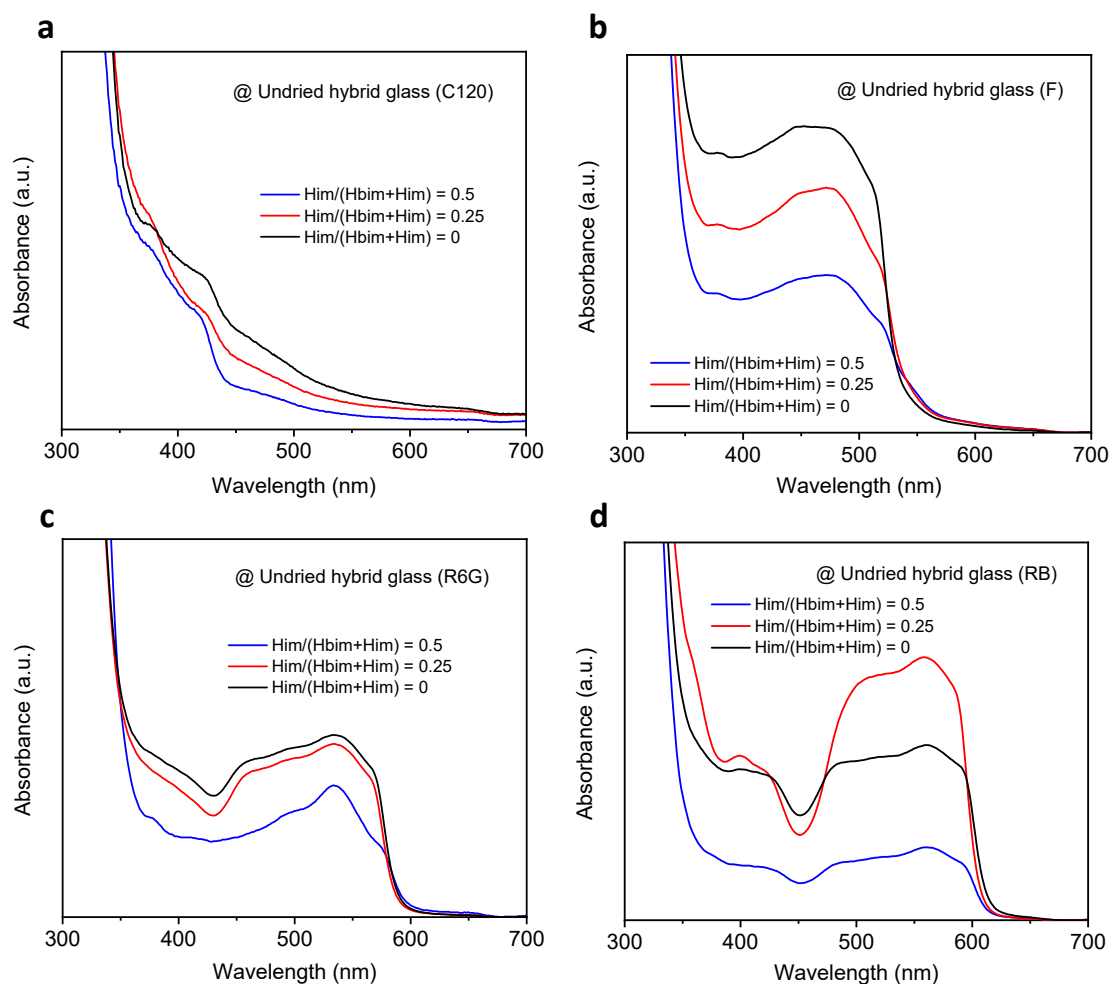

**Fig. S20.** UV-Vis absorption spectra of the undried hybrid glasses doped with **a**, C120, **b**, F, **c**, R6G, and **d**, RB at  $Him/(Hbim+Him) = 0, 0.25$ , and  $0.5$ .

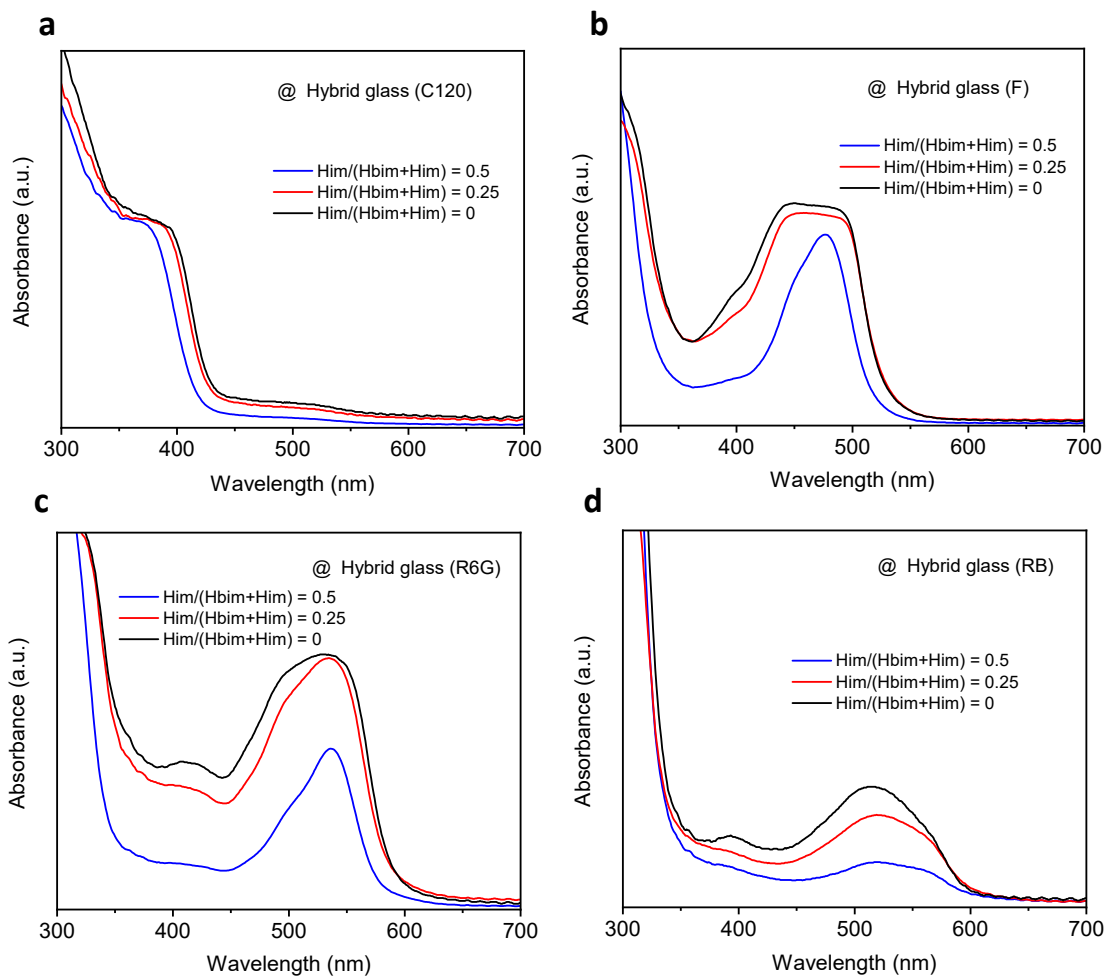

**Fig. S21.** UV-Vis absorption spectra of the hybrid glasses doped with **a**, C120, **b**, F, **c**, R6G, and **d**, RB at  $\text{Him}/(\text{Hbim}+\text{Him}) = 0, 0.25$ , and  $0.5$ .

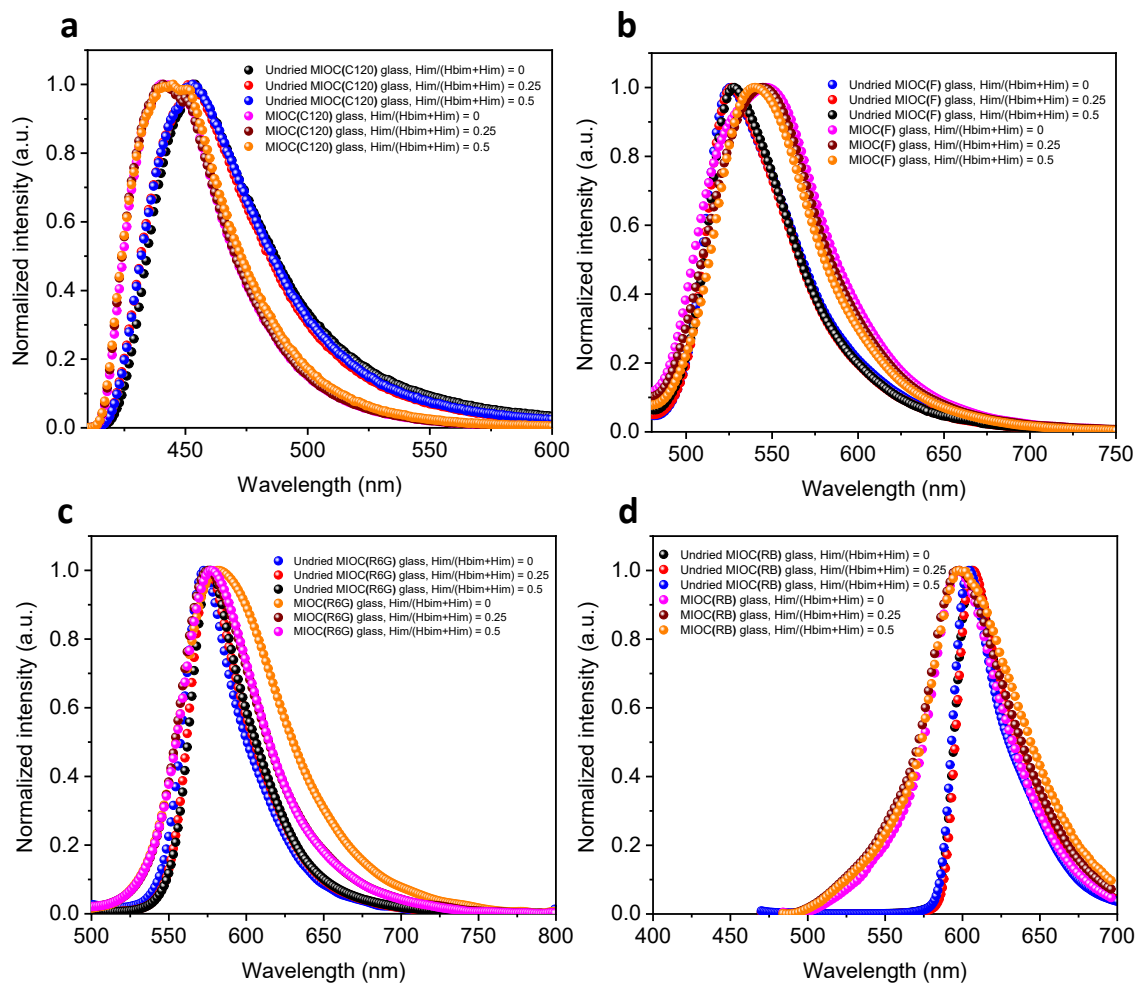

**Fig. S22.** PL spectra the undried hybrid glasses and hybrid glasses doped with **a**, C120, **b**, F, **c**, R6G, and **d**, RB at  $Him/(Hbim+Him) = 0, 0.25$ , and  $0.5$ .

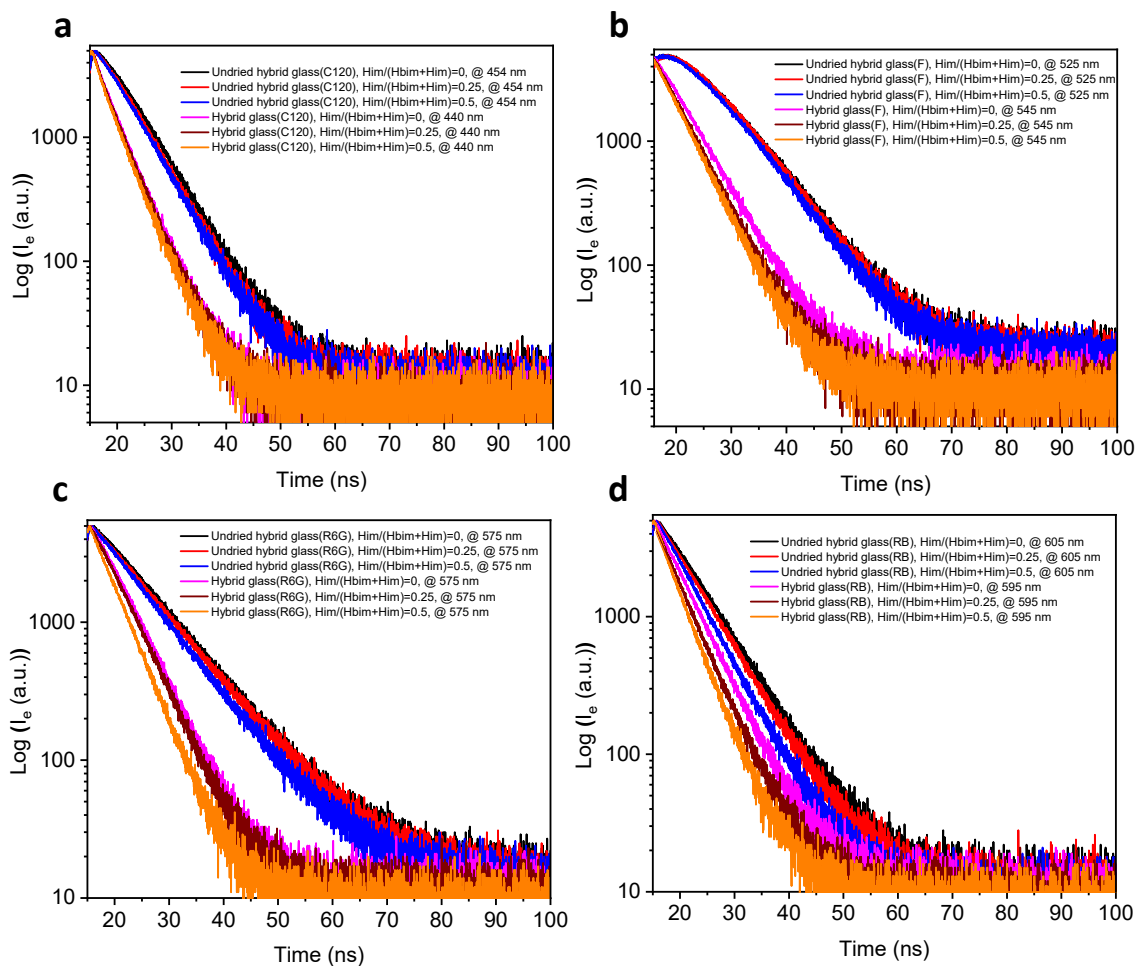

**Fig. S23.** PL decay curves of the undried hybrid glasses and hybrid glasses doped with **a**, C120, **b**, F, **c**, R6G, and **d**, RB at  $\text{Him}/(\text{Hbim}+\text{Him}) = 0, 0.25$ , and  $0.5$ .

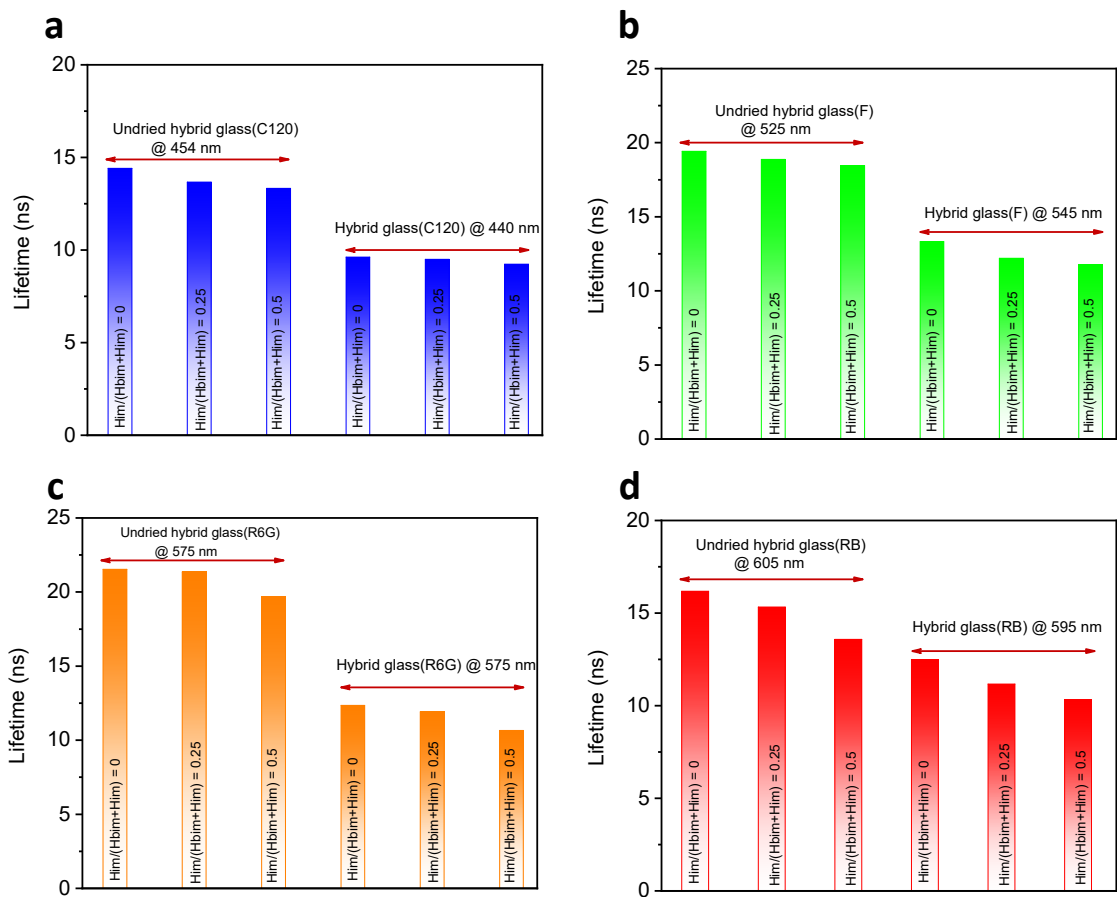

**Fig. S24.** Lifetime values of the undried hybrid glasses and hybrid glasses doped with **a**, C120, **b**, F, **c**, R6G, and **d**, RB at Him/(Hbim+Him) = 0, 0.25, and 0.5.

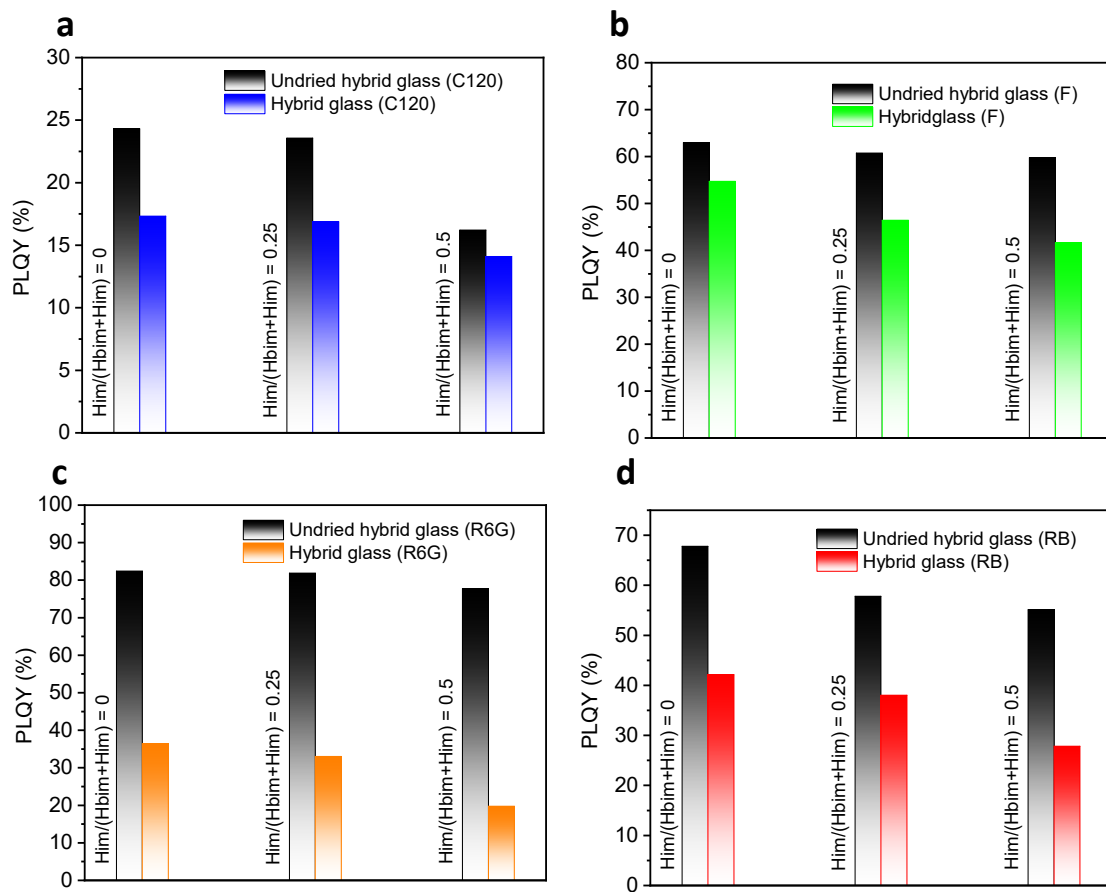

**Fig. S25.** PLQY of the undried hybrid glasses and hybrid glasses doped with **a**, C120, **b**, F, **c**, R6G, and **d**, RB at Him/(Hbim+Him) = 0, 0.25, and 0.5.

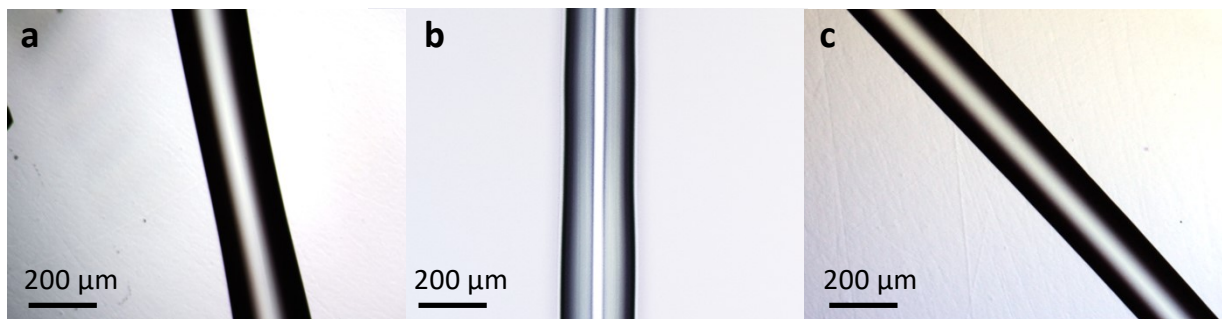

**Fig. S26.** Optical microscope images of the undoped hybrid glass fiber at **a**,  $H_{im}/(H_{bim}+H_{im}) = 0$ , **b**,  $H_{im}/(H_{bim}+H_{im}) = 0.25$ , and **cH\_{im}/(H\_{bim}+H\_{im}) = 0.5.**

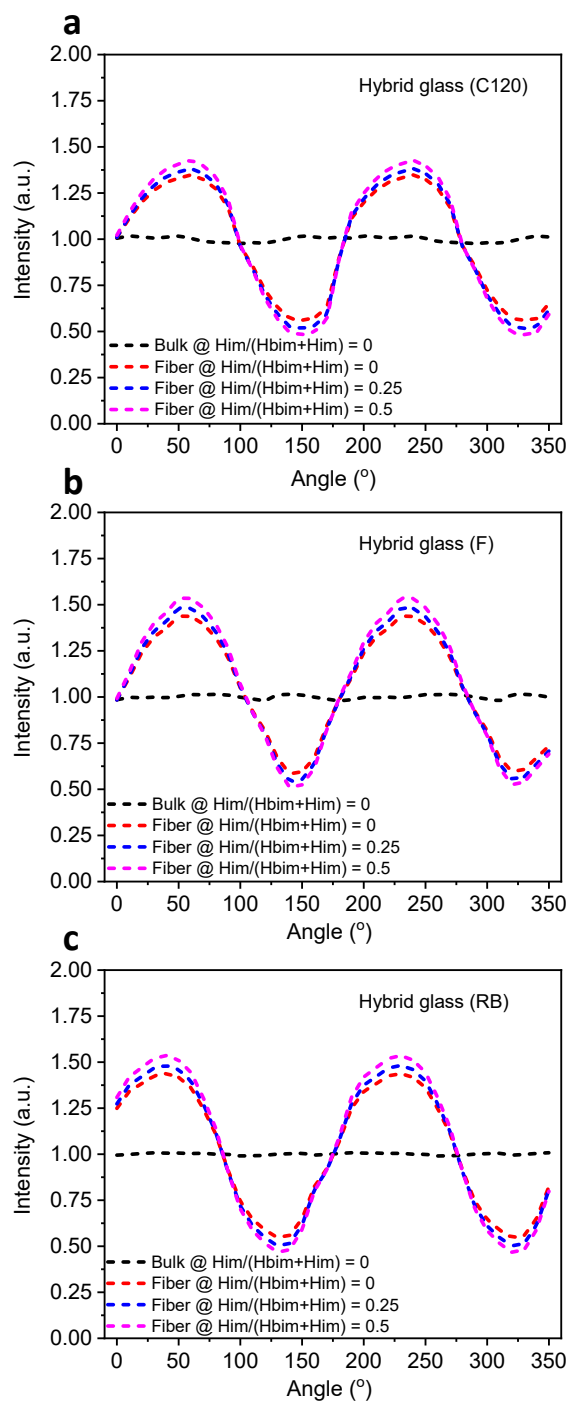

**Fig. S27.** The variation of integrated PL intensity with different polarization angles for the dried hybrid fiber and bulk glass doped with **a**, C120, **b**, F, and **c**, RB at  $H_{im}/(H_{bim}+H_{im}) = 0, 0.25$ , and  $0.5$ , under the excitation of polarized laser parallel to the fiber axis. The glass fibers doped with C120, F, and RB (a diameter of  $200\ \mu\text{m}$ ) and bulk glasses were excited by 405 nm and 460 nm polarized lasers, respectively.
